# Supplementary material
Source: PubMed Central journal article supplement (PMC7984685)
Supplement: 15-01289.pdf [file 15-01289.pdf]

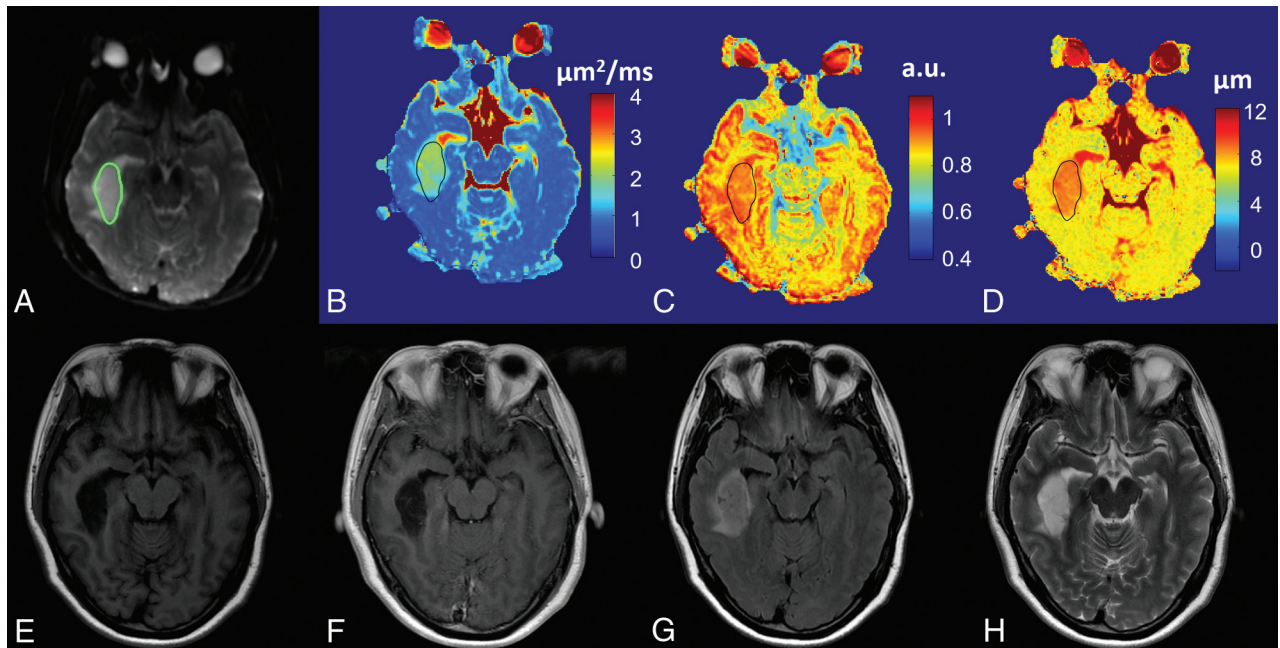

**ON-LINE FIG 1.** A 41-year-old female patient with a low-grade glioma (oligodendroglioma, WHO grade I). *First row:* T2-weighted EPI at  $b=0$  with the tumor ROI encircled in green (A), and FROC parameter maps of  $D$  (B),  $\beta$  (C), and  $\mu$  (D) with the tumor ROIs indicated by the *black contours*. *Second row:* Axial precontrast T1-weighted FLAIR (E), postcontrast T1-weighted FLAIR (F), precontrast T2-weighted FLAIR (G), and precontrast T2-weighted PROPELLER (H). Compared with the patient with glioblastoma multiforme in Fig 2, all 3 FROC parameters exhibited higher values. a.u. indicates arbitrary units. The color scale in (B) is expressed in square micrometers/millisecond.

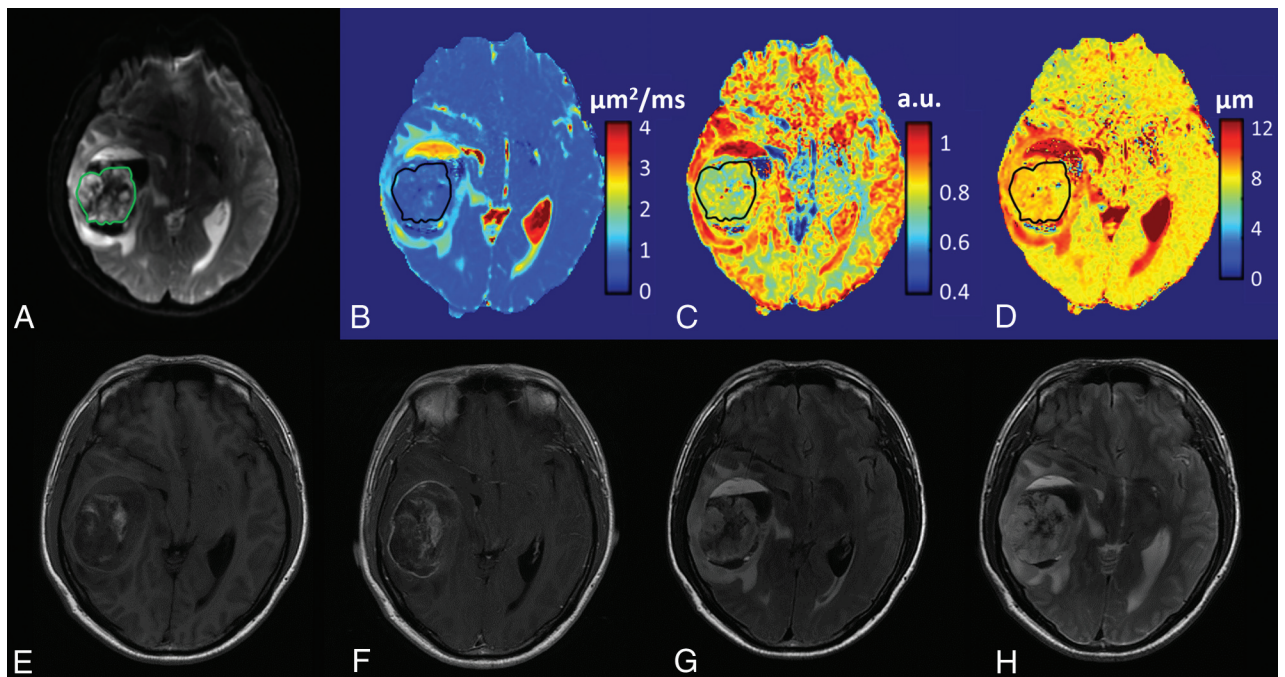

**ON-LINE FIG 2.** A 38-year-old male patient with a high-grade glioma (glioblastoma multiforme, WHO grade IV). *First row:* T2-weighted EPI at  $b=0$  with the tumor ROI encircled in green (A), and FROC parameter maps of  $D$  (B),  $\beta$  (C), and  $\mu$  (D) with the tumor ROIs indicated by the *black contours*. *Second row:* Axial precontrast T1-weighted FLAIR (E), postcontrast T1-weighted FLAIR (F), T2-weighted FLAIR (G), and T2-weighted PROPELLER (H). Compared with the patient with an oligodendroglioma in Fig 1, all 3 FROC parameters exhibited lower values. a.u. indicates arbitrary units. The color scale in (B) is expressed in square micrometers/millisecond.
